# Supplementary material
Source: PubMed Central journal article supplement (PMC7104673)
Supplement: supplementary_figure_ddz229.pdf [file supplementary_figure_ddz229.pdf]

## Supplementary Figure for

### **Progranulin mutations result in impaired processing of prosaposin and reduced glucocerebrosidase activity.**

**Authors:** Clarissa Valdez<sup>1X</sup>, Daniel Ysselstein<sup>1X</sup>, Tiffany J. Young<sup>1</sup>, Jianbin Zheng<sup>1</sup> and Dimitri Krainc<sup>1\*</sup>

\*Corresponding author. Email: [krainc@northwestern.edu](mailto:krainc@northwestern.edu)

#### **This PDF file includes:**

- Fig. S1. Increased lysosomal GCCase activity in *PGRN* mutant fibroblast upon incubation of saposin C.

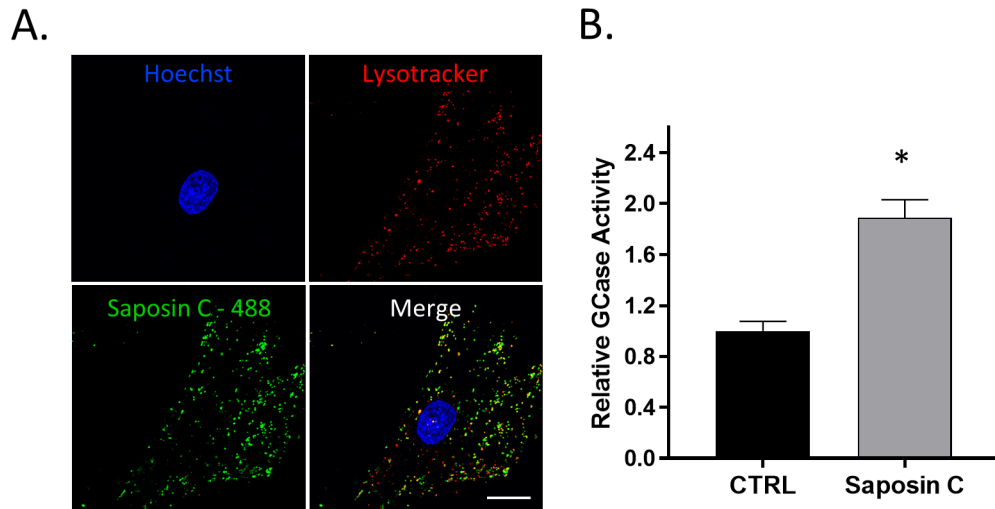

**Figure S1. Increased lysosomal GCase activity in *PGRN* mutant fibroblast upon incubation of saposin C.** (A) Confocal images of patient fibroblast containing a *PGRN* mutation showing colocalization of Alexafluor-488 labeled saposin C with lysotracker positive compartments after 3 hour treatment with saposin C (200 ng/ml). (B) Quantification of lysosomal GCase activity in patient fibroblasts with *PGRN* mutant neurons with and without treated with recombinant saposin C (200 ng/ml). Scale bar=10  $\mu$ m. Data are presented as mean  $\pm$  SEM, \* $P$ <0.05, two tailed Student's t-test.
